# Supplementary material
Source: Elsevier journal article supplement (https://www.sciencedirect.com/science/article/pii/S113610341730196X)
Supplement: mmc1 [file S113610341730196X:mmc1.docx]

**ANEXO**

**Cuestionario de afrontamiento del estrés generado por los problemas de conducta de los hijos**

A veces el comportamiento de nuestros hijos no es el que esperamos –nos desobedecen, se enfadan e incluso pueden actuar de forma agresiva. Cuando esto ocurre, podemos experimentar tensión, ansiedad o estrés, emociones a las que nos enfrentamos de formas que pueden ser más o menos efectivas. Para poder ayudar a las familias frente la tensión y el estrés generados por los problemas de conducta, los profesionales necesitamos conocer qué formas de afrontar tales emociones son más frecuentes. Con este fin le pedimos que señale la frecuencia con que actúa del modo en que se indica ante cada una de las situaciones siguientes teniendo en cuenta la siguiente escala.

| 1  Totalmente en desacuerdo | 2  Bastante en desacuerdo | 3  Indiferente | 4  Bastante de acuerdo | 5  Totalmente de acuerdo |
| --- | --- | --- | --- | --- |

|  | **Situaciones problema e items para evaluar el modo de afrontamiento** | Estrategia | Estilo |
| --- | --- | --- | --- |
| ***A)*** | ***Si alguna vez las desobediencias de mi hijo/a me han creado profundo malestar:*** |  |  |
| 1 | He pensado reiteradamente en las desobediencias, en que me gustaría que no hubiera actuado así. | Rumiación | ANE1 |
| 2 | He pensado en otras cosas o he hecho algo que me ayudase a no pensar en sus desobediencias. | Evitar pensar | APE |
| 3 | Normalmente he buscado aislarme para no tener que comentar con nadie mi preocupación. | Aislamiento | ANE |
| 4 | He procurado comentarlo con otra persona para que me ayudase a saber qué hacer para conseguir que me obedezca. | Buscar ayuda | ACP |
| 5 | He procurado buscar por mí mismo cómo resolver el problema, pensando cómo conseguir que obedezca. | Solucionar el problema | ACP |
| 6 | Me he dejado llevar de mis sentimientos y he actuado sin pensarlo apenas, según sentía o se me ocurría. | Impulsividad | ANE |
| 7 | Me he culpado a mí mismo/a por no haber sabido prevenir que podría desobedecer. | Autoculpa | ANE |
| 8 | He pensado en positivo, tratando de aprender de lo ocurrido para que no vuelva a pasar | Pensar en positivo | ACP |
| 9 | He intentado cambiar mi estado de ánimo pensando en las cosas más alegres. | Pensamiento alegre | APE |
| 10 | Suelo decirme que ya se me pasará el disgusto | Esperar | APE |
| 11 | Me digo que si no me ha obedecido esta vez, debo seguir intentando conseguir que obedezca | Reintentar | ACP |
| 12 | Si la desobediencia me afecta tanto que me genera ansiedad, procuro relajarme controlando la respiración. | Relajación | APE |
| ***B)*** | ***Cuando me he enfadado con mi hijo/a debido a su mal comportamiento, y el enfado me ha hecho sentirme mal*** |  |  |
| 13 | He pensado reiteradamente el enfado, en que me gustaría haber sabido actuar de modo más efectivo sin enfadarme. | Rumiación | ANE |
| 14 | He procurado pensar en otras cosas o hacer algo que me ayudase a no pensar en lo ocurrido. | No pensar | APE |
| 15 | Normalmente he buscado aislarme para no tener que comentar con nadie el disgusto causado por mi propio enfado. | Aislamiento | ANE |
| 16 | He buscado comentar lo que me pasaba con otra persona para que me ayudase a saber qué hacer para no disgustarme. | Buscar ayuda | ACP |
| 17 | He procurado buscar por mí mismo/a qué puedo decir o qué puedo hacer para evitar enfadados como el que he tenido. | Solucionar el problema | ACP |
| 18 | Me he dejado llevar de los sentimientos que me ha producido el enfado y he actuado sin pensarlo apenas, según se me ocurría. | Impulsividad | ANE |
| 19 | Me he culpado a mí mismo/a por no haber sabido prevenir el problema y evitar el enfado. | Autoculpa | ANE |
| 20 | He pensado en positivo, tratando de aprender de lo ocurrido para que no vuelva a pasar. | Pensar en positivo | ACP |
| 21 | He procurado pensar en la gente que me apoya y me entiende, porque eso me anima. | Pensamiento alegre | APE |
| 22 | Sea cual sea la razón del enfado, me digo que la vida sigue y procuro pasar a otra cosa | Esperar | APE |
| 23 | Aunque no haya conseguido que me obedezca, intento centrarme en mis logros y en cómo aprender de los errores. | Reintentar | ACP |
| 24 | Si me afecta tanto que me genera nerviosismo, suelo respirar hondo para poder relajarme. | Relajación | APE |
| **C)** **Si mi hijo/a ha insultado, ha herido verbalmente o, incluso, ha agredido a alguien, causándome un disgusto:** | | | |
| 25 | Normalmente le doy muchas vueltas a la cabeza, deseando que no se comportase así antes de poner remedio. | Rumiación | ANE |
| 26 | He pensado en otras cosas o he hecho algo que me ayudase a no pensar en su mal comportamiento. | No pensar | APE |
| 27 | Normalmente he buscado aislarme para no tener que comentar con nadie el disgusto. | Aislamiento | ANE |
| 28 | Le he contado a otra persona mi disgusto para que me ayudase a saber qué hacer para no disgustarme. | Buscar ayuda | ACP |
| 29 | He procurado buscar por mí mismo/a qué puedo decir o qué puedo hacer para evitar que se comporte mal en situaciones similares. | Solucionar el problema | ACP |
| 30 | Me he dejado llevar de mis sentimientos y he actuado sin pensarlo apenas, según sentía o se me ocurría. | Impulsividad | ANE |
| 31 | Me he culpado a mí mismo/a por no haber sabido prevenir el problema y evitar que se comportase mal. | Autoculpa | ANE |
| 32 | He pensado en positivo, tratando de aprender qué me aportaba que me pudiese servir en el futuro. | Pensar en positivo | ACP |
| 33 | Intento cambiar mi estado de ánimo pensando en otras cosas que me hagan olvidar el disgusto que me causa el mal comportamiento. | Pensamiento alegre | APE |
| 34 | Si lo que me disgusta es que siento que no puedo evitar que mi hijo/a actúe así, me digo que la vida sigue y podemos cambiar. | Esperar | APE |
| 35 | Procuro pensar en las veces que he conseguido que se porte bien para aprender cómo ayudarle. | Reintentar | ACP |
| 36 | Si me afecta tanto que me genera tensión, intento relajarme respirando pausadamente. | Relajación | APE |
| 1 ANE: Afrontamiento negativo de las emociones; APE: Afrontamiento positivo de las emociones; ACP: Afrontamiento centrado en el problema | | | |

.
